1 **Deep-sea plastisphere: long-term colonization by plastic-associated bacterial and archaeal**  
2 **communities in the Southwest Atlantic Ocean**

3  
4 Luana Agostini<sup>a</sup>, Julio Cezar Fornazier Moreira<sup>a\*</sup>, Amanda Gonçalves Bendia<sup>a</sup>, Maria Carolina  
5 Pezzo Kmit<sup>a</sup>, Linda Gwen Waters<sup>a</sup>; Marina Ferreira Mourão Santana<sup>a</sup>; Paulo Yukio Gomes  
6 Sumida<sup>a</sup>, Alexander Turra<sup>a</sup>, Vivian Helena Pellizari<sup>a</sup>

7  
8 <sup>a</sup> Instituto Oceanográfico, Universidade de São Paulo, Praça do Oceanográfico, 191, São Paulo  
9 CEP: 05508-120, Brazil

10  
11 \*Corresponding author: Instituto Oceanográfico, Universidade de São Paulo, Praça do  
12 Oceanográfico, 191, São Paulo CEP: 05508-120, Brazil. E-mail address: [jfornazier@usp.br](mailto:jfornazier@usp.br).

## 13 **Abstract**

14 Marine plastic pollution is a global concern because of continuous release into the oceans over the  
15 last several decades. Although recent studies have made efforts to characterize the so-called  
16 plastisphere, or microbial community inhabiting plastic substrates, it is not clear whether the  
17 plastisphere is defined as a core community or as a random attachment of microbial cells. Likewise,  
18 little is known about the influence of the deep-sea environment on the plastisphere. In our  
19 experimental study, we evaluated the microbial colonization on polypropylene pellets and two  
20 types of plastic bags: regular high density polyethylene (HDPE) and HDPE with the oxo-  
21 biodegradable additive BDA. Gravel was used as control. Samples were deployed at three sites at  
22 3,300 m depth in the Southwest Atlantic Ocean and left for microbial colonization for 719 days.  
23 For microbial communities analysis, DNA was extracted from the biofilm on plastic and gravel  
24 substrates, and then the 16S rRNA was sequenced through the Illumina Miseq platform.  
25 Cultivation was performed to isolate strains from the plastic and gravel substrates. Substrate type  
26 strongly influenced the microbial composition and structure, while no difference between sites was  
27 detected. Although several taxa were shared among plastics, we observed some groups specific for  
28 each plastic substrate. These communities comprised taxa previously reported from both epipelagic  
29 zones and deep-sea benthic ecosystems. The core microbiome (microbial taxa shared by all plastic  
30 substrates) was exclusively composed by low abundance taxa, with some members well-described  
31 in the plastisphere and with known plastic-degradation capabilities. Additionally, we obtained  
32 bacterial strains that have been previously reported inhabiting plastic substrates and/or degrading  
33 hydrocarbon compounds, which corroborates our metabarcoding data and suggests the presence of  
34 microbial members potentially active and involved with degradation of these plastics in the deep  
35 sea.

36 **Keywords:** core microbiome, microbial colonization, plastics, 16S rRNA

## 37 **1. Introduction**

38 Plastic waste has become a global challenge. Although many countries are involved in public  
39 policies to mitigate this problem, tons of plastic waste continue to enter the oceans annually  
40 (GESAMP, 2019; Jambeck et al., 2015; PlasticEurope, 2019; Schmidt et al., 2017). As a  
41 consequence, marine plastic contamination is ubiquitous, including in remote marine environments  
42 such as the deep ocean (Woodall et. al., 2014). In the marine environment, plastic waste is exposed  
43 to physical and chemical factors that contribute to the degradation and fragmentation of this  
44 material into microplastics (i.e. plastic objects < 5 mm in diameter) (Roager and Sonnenschein,  
45 2019). Microplastic chemical composition, density and shape determine whether it is more likely  
46 to float or sink, which will influence the distribution in pelagic or benthic ecosystems (Cole et al.,  
47 2011; Pierdomenico et al., 2019; Pinnell and Turner, 2019; Van Cauwenberghe et al., 2013;  
48 Woodall et al., 2014). Although both macro- and microplastics have already been reported in deep-  
49 ocean regions, knowledge regarding plastic colonization by deep-sea prokaryotic communities in  
50 both pelagic and benthic ecosystems is incipient (Bergmann and Klages, 2012; Chiba et al., 2018;  
51 Galgani et al., 1996; Krause et al., 2020; Pierdomenico et al., 2019; Schlining et al., 2013; Woodall  
52 et al., 2018).

53 Plastics can be used as substrata and be rapidly colonized by microorganisms, which form biofilms  
54 on the plastic surface, a community we refer to as the “plastisphere” (Zettler et al., 2013). The  
55 ability to colonize and metabolize substrate surfaces is a mechanism that promotes advantages for  
56 microorganisms in situations with nutritional limitation (Dang and Lovell, 2016), as can be the  
57 case in deep-sea regions. Plastic substrates in the deep ocean may offer a new hotspot of  
58 colonization, as well as a relevant source of carbon to support the microbial community,  
59 proportionally magnifying the abundance of potentially plastic degrading microorganisms within

60 the plastisphere. A growing number of studies have reported microorganisms capable of degrading  
61 hydrocarbons (Didier et al., 2017; Oberbeckmann et al., 2017), raising the hypothesis that they  
62 would be consuming this material in nutritionally limited conditions, such as those found in deep-  
63 sea ecosystems.

64 In addition to the influence of the environment (which can be prone to microbial colonization or  
65 not), polymer composition is suggested to modulate the structure and composition of the  
66 plastisphere (Dussud et al., 2018a; Dussud et al., 2018b; Kirstein et al., 2018, 2019; McCormick  
67 et al., 2014; Pinto et al., 2019; Zettler et al., 2013). Moreover, geographic locations have also been  
68 indicated to exert influence on the microbial community of the plastisphere (Oberbeckmann et al.,  
69 2016). In contrast, independent of environmental factors or plastic substrate type, some microbial  
70 taxa have been reported in multiple plastispheres (Tu et al., 2020; Zettler et al., 2013) and they are  
71 now referred to as “core microbiome”. The core microbiome members comprise taxa with high  
72 occupancy across a dataset that are hypothesized to reflect functional relationships with the host  
73 (or substrate) (Shade and Handelsman, 2012). In the plastisphere, these members are thought to be  
74 involved in biofilm formation and/or metabolizing compounds from the plastic substrate (Didier  
75 et al., 2017; Tu et al., 2020). Bacterial families such as Oleiphilaceae and Hyphomonadaceae have  
76 been found colonizing multiple substrates (Bryant et al., 2016; De Tender et al., 2017;  
77 Oberbeckmann et al., 2018; Pinto et al., 2019; Zettler et al., 2013). The known capacity of these  
78 families to metabolize hydrocarbon compounds may be the key functional trait enabling them to  
79 colonize different plastics (Golyshin et al., 2002; Ozaki et al., 2007).

80 In the last decade, the number of studies on the plastisphere has increased (Amaral-Zettler et al.,  
81 2020). However, efforts have been concentrated mainly on epipelagic (e.g. Bryant et al., 2016;  
82 Carson et al., 2013; Zettler et al., 2013) or shallow benthic systems (Pinnel and Turner, 2019).

83 Only a few studies, however, analyzed the plastisphere in deep-sea habitats (Krause et. al., 2020;  
84 Woodal et. al, 2018). Studies that assessed marine plastisphere microbial communities can be  
85 classified into three basic groups: those that randomly collected plastic marine debris (PMD) or  
86 microplastics (Bryant et al., 2016; De Tender et al., 2015; Zettler et al., 2013); studies that deployed  
87 plastic substrates in the ocean (Oberbeckmann et al., 2016; Tu et al., 2020) and those conducted in  
88 laboratory conditions (Kirstein et al., 2018; Ogonowski et al., 2018). The microbial community  
89 structure inhabiting deployed plastic substrates for long periods is as yet poorly studied (Kirstein  
90 et al., 2018; Oberbeckmann et al., 2016, 2018; Tu et al., 2020). Based on these studies, the marine  
91 plastic bacterial community is mainly represented by the Gammaproteobacteria,  
92 Alphaproteobacteria and Bacteroidetes classes, while the archaeal community is represented by  
93 the Euryarchaeota and Crenarchaeota phyla (Eriksen et al., 2014; Oberbeckmann et al., 2018;  
94 Oberbeckmann and Labrenz, 2020; Quero and Luna, 2017; Urbanek et al., 2018; Woodall et al.,  
95 2018).

96 Here, we conducted the first *in situ* experimental study that characterized the structure and  
97 composition of the microbial community (the bacterial and archaeal) associated with different  
98 types of plastic substrates deployed for 719 days at three sites in deep waters in the Southwest  
99 (SW) Atlantic Ocean (3,300 m). Our objectives in this study were to understand (i) if there are  
100 differences in microbial communities inhabiting plastics polymers as opposed to control samples  
101 and adjacent seawater, and differences among multiple sites, (ii) if there is a core microbiome  
102 among plastics that can contribute to the description of the plastisphere in the deep SW Atlantic  
103 Ocean (different from shallow waters), and (iii) if it is possible to isolate viable bacteria through  
104 cultivation of plastic substrates that are potentially related to plastic degradation. For this, we  
105 performed a high-throughput sequencing of the 16S rRNA gene to access bacterial and archaeal

106 communities and used traditional culturing methods to assess the plastics as substrates for  
107 microbial growth.

108

## 109 **2. Materials and Methods**

### 110 2.1. Studied area and deployment methods

111 Experimental sites are located in a region that encompasses the transition between the North  
112 Atlantic Deep Water (NADW) and the Lower Circumpolar Deep Water (LCDW). This region is  
113 characterized by water temperature between 3 °C and 4 °C, salinity between 34.6 and 35.0, oxygen  
114 concentration above 5 mL L<sup>-1</sup> and low nutrient levels (i.e. oligotrophic) (Gonzalez-Silvera et al.,  
115 2004; Krueger et al., 2015).

116 Autonomous aluminum structures that housed multiple experiments, called landers, were deployed  
117 at three sites along the southeastern Brazilian continental margin, and between 21°S and 28°S. The  
118 sites were named ES (22°50'27.24"S; 38°24'58.68"W), RJ (25°20'17.88"S; 39°38'28.32"W) and SP  
119 (28°1'42.24"S; 43°31'43.32"W), with distances of 304 km between ES and RJ, 786 km between ES  
120 and SP, and 496 km between RJ and SP (Figure 1). Landers were deployed in June 2-6, 2013 at  
121 3,300 m depth, using the R/V Alpha Crucis from the Oceanographic Institute at Universidade de  
122 São Paulo (IO-USP). On each lander, single use plastic bags of two different polymers, 60g of  
123 pristine PP pellets (Braskem) and 60 g of inorganic material as a control were deployed. Plastic  
124 bags included: (i) regular high density polyethylene (HDPE) grocery bag material (Valbags,  
125 ValGroup Brasil), (ii) biodegradable grocery bag material made from HDPE with the oxo-  
126 biodegradable additive BDA (Willow Ridge Plastics, Inc.). All types of substrates were placed

127 inside fiberglass mesh bags (~8 x 15 cm; mesh size, 1 mm), attached to the metal lander frame and  
128 secured with nylon fishing line and rope before deployment.

129 After 719 days in all cases, 23.6 months (on May 22-25, 2015), samples were collected with the  
130 support of NPo Almirante Maximiano (H-41, Brazilian Navy). For DNA extraction, 30 pellets of  
131 gravel, plastic and cut strips of plastic bag material were rinsed lightly with autoclaved distilled  
132 water. These were then placed into vials (10 per vial for pellets or sufficient to occupy  
133 approximately the same vial volume as pellets for bags, n = 3 replicate vials), filled with RNAlater  
134 buffer solution (Thermo Fisher Scientific, Waltham, MA, USA), and stored at -20 °C until analysis.  
135 For live culturing, an additional 5 pellets or cut strips of plastic bag material were placed directly  
136 into Eppendorf tubes and filled with sterilized seawater without rinsing. Eppendorf tubes were  
137 shaken gently, and stored at 4 °C until analysis. All handling materials were sterilized between  
138 every step.

139 Before retrieving each lander, water samples from the same depth and current as the plastic samples  
140 were collected using a Rosette water sampler equipped with Niskin bottles. Water samples  
141 (adjacent water - AW) were collected to analyze the structure of the microbial communities in the  
142 environment where plastics were deployed. Each water sample collected (~ 10 L) was immediately  
143 filtered through a 0.22 µm polycarbonate membrane (diameter 45 mm; Millipore, Bedford, MA,  
144 USA) using a peristaltic pump, and stored at -80 °C.

145

## 146 2.2. DNA extraction, 16S rRNA gene amplification and sequencing

147 Samples were processed at LECOM, the Microbial Ecology Laboratory at the Oceanographic  
148 Institute (IO-USP) of University of São Paulo. Extraction of the total DNA from the plastics was

149 performed in triplicate using the PowerSoil DNA Isolation Kit (MoBio, Carlsbad, CA, USA).  
150 Extraction of DNA from the water was performed using a PowerWater DNA Isolation Kit (MoBio,  
151 Carlsbad, CA, USA) according to the manufacturer's specifications.

152 Six PCR reactions from each sample were pooled and purified with the DNA Clean &  
153 Concentrator™ kit (Zymo Research, Irvine, CA, USA), and quantified with Qubit 1.0 fluorometer  
154 (Thermo Fisher Scientific, Waltham, MA, USA) and the Qubit® dsDNA HS Assay Kit (Thermo  
155 Fisher Scientific, Waltham, MA, USA). PCR was conducted following the Earth Microbiome 16S  
156 Illumina Amplicon Protocol. Amplicons were sent to the Molecular Research - MR. DNA  
157 company (Texas, USA) for sequencing on the Illumina Miseq platform in a 2x300 bp pair-end  
158 system. The V4 hypervariable region of the 16S rRNA gene from Bacteria and Archaea was  
159 amplified with the universal primers 515F and 806R (Caporaso et al., 2010) with specific adapters  
160 for the Illumina Miseq platform. Sequence data (raw .fastq files) have been submitted to the  
161 GenBank under accession number PRJNA692207.

162

### 163 2.3. Bioinformatics and statistical analyses

164 Processing and quality control of reads was performed using QIIME2 version 2019.10 (Bolyen et  
165 al., 2019). After graphic inspection of quality profiles, raw reads were subjected to trimming and  
166 filtering, then clustered into Amplicon Sequence Variants (ASV) with DADA2 denoising  
167 (Callahan et al., 2016) using the QIIME 2 package (Bolyen et al., 2019). Sequence counts were  
168 rarefied to 45,020 reads per sample across all samples to mitigate uneven sequencing depth.

169 The ASV richness, Shannon and InvSimpson diversity indexes were calculated using *phyloseq* and  
170 *vegan* packages. Normality and Homogeneity of variances was assessed by Shapiro-Wilk



171 normality and Levene's test, respectively. If the data showed a normal distribution and the  
172 variances were homogeneous, differences between groups were assessed by one-way analysis of  
173 variance (ANOVA) and subsequent post-hoc Tukey's tests, which were performed using *stats* and  
174 *agricolae* packages in R (v.3.6.1) to assess differences in diversity indexes among substrates and  
175 sites. To compare the structure of the bacterial communities among substrates and sites, non-metric  
176 multidimensional scaling (NMDS) ordination was performed, based on weighted unifracs  
177 dissimilarities among all samples. Differences in the microbial community structure among  
178 substrates and sites were tested by performing a permutational multivariate analysis of variance  
179 (PERMANOVA) on the community matrix (Anderson, 2001).

180 To identify an ASV that was significantly more abundant among substrate types, we performed  
181 DESeq2, Differential Expression analysis for Sequence count data (Love et al., 2014). The DESeq2  
182 input was a rarefied microbial dataset previously treated using the Prevalence Interval for  
183 Microbiome Evaluation (PIME) package (Roesch et al., 2020). PIME uses machine-learning to  
184 generate ASV prevalence among samples, and validate it by comparison with control Monte Carlo  
185 simulations with randomized variations of sequences (Roesch et al., 2020). The full rarefied dataset  
186 consisting of 5,199 ASVs was filtered using the PIME R package (Roesch et al., 2020). PIME  
187 removes the within-group variations and captures only biologically significant differences which  
188 have high sample prevalence levels. PIME employs a supervised machine-learning algorithm to  
189 predict random forests and estimates out-of-bag (OOB) errors for each ASV prevalence dataset at  
190 5% intervals. High OOB errors indicate that a given prevalence dataset interval is noisy, while the  
191 minimal OOB errors (OOB error = zero) represent the absence of noise. Here, the minimal OOB  
192 errors occurred with a 70% prevalence interval, which represented 471,078 sequences distributed  
193 among 535 ASVs. This 70% prevalence dataset was used for DESeq2 subsequent analyses.

194 To observe the occurrence of ASVs among substrate types, the samples were grouped by substrate  
195 type and the taxa abundance table transformed to presence/absence. The unique and shared ASVs  
196 were then visualized using an UpSet plot, *UpSetR* package (Conway et al., 2017). The ASVs shared  
197 by all plastic types were considered the core microbiome.

198

#### 199 2.4. Cultivable Plastic-associated Bacteria

200 In sterile Petri dishes, samples of plastic substrates were inoculated directly into the mineral culture  
201 medium described by Sekiguchi et al., (2010). The medium was prepared to contain per liter of  
202 distilled water: 1.87% of Marine Broth (Difco), 1.5% NaCl, 0.35% KCl, 5.4% MgCl<sub>2</sub> · 6H<sub>2</sub>O, 2.7%  
203 MgSO<sub>4</sub> · 7H<sub>2</sub>O, 0.5% CaCl<sub>2</sub> · 2H<sub>2</sub>O, 1.2% agar with 0.25% poly-β-hydroxybutyrate (PHB) granules  
204 added. The samples were incubated for 15 days at 13 °C, or until the growth of colonies around  
205 the plastic samples was observed. All morphologically different macroscopic colonies were  
206 selected using the depletion technique two to three times until pure colonies for sequencing were  
207 obtained. The isolates were preserved in 20% glycerol in an ultra-freezer at -80 °C.

208 The genomic DNA of 22 isolates was extracted using the Purelink Genomic DNA kit (Invitrogen  
209 by Thermo Fisher Scientific, Carlsbad, USA), according to the manufacturer's specifications.

210 Amplification of the RNAr 16S gene was conducted using primers 515F (5' -  
211 GTGYCAGCMGCCGCGGTAA - 3') and 1401R (5' - CGGTGTGTACAAGGCCCGGGA - 3').

212 The polymerase chain reaction (25 μL reaction) was performed using Gotaq Mix Hot Start, 0.25  
213 μL of each primer and 2 μL of DNA template. The PCR conditions were: initial denaturation  
214 temperature of 95 °C, 3 min; followed by 30 cycles of 94 °C, 1 min; 53 °C, 30 seconds; 72 °C, 1  
215 min; and a final extension at 72 °C for 10 min. The PCR product was purified using the DNA

216 Clean & Concentrator kit (Zymo Research, Irvine, USA) according to the manufacturer's  
217 specifications and sent for sequencing at Genomic Engenharia Molecular, where they were  
218 sequenced using the BigDye Terminator v3.1 Cycle Sequencing Kit (Applied Biosystems, Palo  
219 Alto, USA) with the 515F primer.

220 Sequence analysis was initially performed using CodonCodeAligner Software (CodonCode  
221 Corporation, Dedham, MA, USA). Through this software, the sequences were checked for quality  
222 and treated. After obtaining the treated sequences, the SILVA v138 database (High-Quality  
223 Ribosomal RNA Databases) was used to align the sequences, to identify the isolates and to  
224 construct the phylogenetic trees through MEGA X software (Kumar et al., 2018), using the  
225 maximum-likelihood method (999 bootstraps). All sequencing data was deposited in GenBank  
226 (National Center for Biotechnology Information Sequence Read Archives) under accession  
227 numbers between MW216888 and MW216902.

228

## 229 **3. Results**

### 230 3.1. ASV richness and Alpha diversity among substrata and sites

231 From the 15 samples sequenced, a total of 1,086,988 valid sequences (i.e. reads) were obtained,  
232 representing an average of  $72,465 \pm 12,068$  (SD) reads per sample. The obtained reads were  
233 clustered into 5,310 ASVs, representing an average of  $702 \pm 149$  ASVs per sample. Rarefaction  
234 curves indicated a stationary phase, suggesting sufficient depth of sequencing to account for the  
235 diversity of the microbial community on the plastic substrates, gravel, and seawater samples  
236 (Figure S1).

237 Overall, among substrate type the ASV richness measured by the Chao1 estimator was  
238 significantly higher on gravel samples ( $898.33 \pm 84.77$ ) (ANOVA;  $F = 4.85$ ;  $df = 4$ ;  $p = 0.027$ ),  
239 while the microbial richness from AW samples and plastic substrates (HDPE and PP) was lower  
240 ( $631 \pm 106$ ,  $616 \pm 80$  and  $583 \pm 141$ , respectively) (Figure S2A). Although the Shannon diversity was  
241 not affected by substrate types (ANOVA;  $F = 2.77$ ;  $df = 4$ ;  $p = 0.102$ ), the diversity observed on  
242 gravel samples was 1.05, 1.07, and 1.2-fold higher than PP, HDPE-OXO, and HDPE samples,  
243 respectively (Figure S2B). The evenness was also not affected significantly by substrate type  
244 (ANOVA;  $F = 1.65$ ;  $df = 4$ ;  $p = 0.111$ ), but a lower mean evenness was observed on HDPE (0.66),  
245 AW (0.68), and HDPE-OXO (0.71), while the PP samples showed the higher evenness (0.76)  
246 (Figure S2C).

247 The site did not exhibit a significant effect on any diversity indexes measured. However, the ASV  
248 richness measured by the Chao1 estimator was higher from RJ samples ( $741.09 \pm 159.06$ )  
249 (ANOVA;  $F = 0.61$ ;  $df = 2$ ;  $p = 0.564$ ), while SP and ES showed similar richness ( $675.54 \pm 81.16$ ;  
250  $681.38 \pm 203.29$ , respectively) (Figure S2D). Shannon index averages were high in RJ samples

251 (4.78±0.55) and SP (4.71±0.20), while ES showed the lowest mean values (4.51±0.55) (ANOVA;  
252  $F = 0.38$ ;  $df = 2$ ;  $p = 0.517$ ) (Figure S2E). Finally, the lowest evenness was observed in the ES  
253 samples (0.69±0.07) and similar between RJ and SP (0.72±0.06 and 0.72±0.02, respectively)  
254 (ANOVA;  $F = 0.61$ ;  $df = 2$ ;  $p = 0.565$ ) (Figure S2F).

255

### 256 3.2. Microbial community structure among substrata and sites

257 Non-metric multidimensional scaling (NMDS) based on weighted Unifrac dissimilarities revealed  
258 that the global pattern of microbial diversity was significantly explained by the substrate type  
259 (Figure 2). Based on Permutational Multivariate Analysis of Variance (PERMANOVA) the  
260 microbial community structure was highly dependent on the substrate type ( $R^2 = 0.78$ ,  $P = 0.001$ ),  
261 while the site effect was lower and not significant ( $R^2 = 0.11$ ,  $P = 0.054$ ). Adjacent water (AW)  
262 samples were particularly distinct, while gravel samples showed more similarities to plastic  
263 samples.

264

### 265 3.3. Microbial composition and taxa differential abundance between plastic and control samples

266 The microbial community of all substrates were composed in majority by the phylum  
267 Proteobacteria (40 to 77%), while other phyla showed different colonization patterns amongst  
268 plastic substrates (HDPE, HDPE-OXO and PP), gravel and AW, including both presence/absence  
269 and differences in relative proportions of the phyla (Figure 3A). For example, Firmicutes was  
270 abundant in all PP samples (average 20±6%), while found in smaller proportions in HDPE  
271 (6.6±6.2%), HDPE-OXO (6.1±5.6%) and gravel samples (3.8±1.9%). Among plastics, NB1-j was  
272 more abundant in HDPE (4.6±5.9%) and archaeal phyla (such as Crenarchaeota and

273 Nanoarchaeota) were prevalent in HDPE and HDPE-OXO ( $5.1\pm4$  and  $7.3\pm4.7\%$ , respectively).  
274 The lowest proportions of those archaeal phyla were observed in PP ( $0.7\pm0.4\%$ ). Chloroflexi,  
275 Marinimicrobia (SAR406 clade) and SAR324 (Marine group B) were mainly present in AW  
276 samples ( $7.1\pm1.6$ ,  $5.6\pm0.28$  and  $6.9\pm0.1\%$ , respectively) but not in the plastic substrates used in  
277 this study.

278 Differences between plastics and gravel samples were strongly evident when we examined deeper  
279 taxonomic levels. We observed ASVs from a total of 37 families that were significantly more  
280 abundant in plastic substrates when compared with gravel samples; these include families, such as  
281 Methylogellaceae, Colwelliaceae, Pseudomonadaceae, Haliangiaceae, Micrococcaceae,  
282 Halieceaea, Oleiphilaceae, Flavobacteriaceae, Rhizobiaceae, Microtrichaeae, Rhodobacteraceae,  
283 among others (Figure 2B). Seven families showed ASVs with differential abundances for both  
284 plastic and gravel samples, such as Cyclobacteriaceae, OM190, Spongiibacteraceae, NB1-j,  
285 Cryomorpaceae, Nitrosopumilaceae and unclassified Bacteroidia. Gravel samples exhibited 16  
286 families significantly more abundant in comparison with plastics (e.g. Kangiellaceae, OM182  
287 clade, Crocinitomicaceae, Sphingomonadaceae and Bacteriovoracaceae ) (Figure 2B).

288

### 289 3.4. Microbial composition and taxa differential abundance among plastic types

290 Among each substrate type, the largest number of unique ASVs was found in gravel samples (1096  
291 ASVs), followed by AW, PP, HDPE-OXO and HDPE, with respective values of 954, 736, 732 and  
292 475 ASVs. Grouping those ASVs into families to examine abundance, we identified a  
293 predominance of low abundance families on all substrates deployed (relative abundance < 2% of

294 total community) on PP (71.9%), HDPE-OXO (63.9%), gravel (56.8%) and HDPE (40.2%). The  
295 percentage of low abundance families in AW samples was lower (21.4%) (Figure 4).

296 Overall, the number of common ASVs amongst substrates deployed (pairwise combinations  
297 among HDPE, HDPE-OXO, PP and gravel) was higher than common ASVs between AW and  
298 substrates deployed (Figure 4). These results may confirm taxa effectively colonizing the  
299 substrates over long periods. Another piece of evidence to support this idea is the high number of  
300 ASVs (201) shared among all substrates deployed, while only 91 ASVs were observed shared  
301 among the substrates deployed and the adjacent water (AW) (Figure 4).

302 Similar polymer composition was also suggested as exerting influence on the microbial taxa  
303 composition. We identified 163 ASVs shared between HDPE and HDPE-OXO, plastic substrates  
304 composed basically by HDPE. In contrast, a lower number of ASVs were shared between PP and  
305 HDPE-OXO (68) and PP and HDPE (46), substrates composed of different polymers (Figure 4).

306 Based on the 44 families with ASVs significantly more abundant in plastic substrates than in gravel  
307 samples (Figure 2B), we checked the distributions of these families amongst plastic substrates  
308 types (Figure 5). Results showed us three major family groups: (i) the generalists, found with  
309 significant abundance in all plastic types (HDPE, HDPE-OXO, and PP), (ii) the plastic HDPE  
310 generalists, found with significant abundance in plastic HDPE substrates (HDPE and HDPE-  
311 OXO), and finally, (iii) the specialists group, composed by families found in differential  
312 abundances in specific plastic substrates.

313 Fourteen families were classified into a generalist group, which included Bdellovibrionaceae,  
314 Halieaceae, Microtrichaceae, Pseudomonadaceae, and uncultured families. The HDPE plastic  
315 generalists were composed of 13 families, including CCM11a, Cryomorphaceae, Oleiphilaceae,

316 Rhizobiaceae and Flavobacteriaceae, Nitrosopumilaceae. Among specialist families, the  
317 Beijerinckiaceae and Staphylococcaceae were significantly more abundant in PP samples, whereas  
318 NB1-j, OM190, Saccharospirillaceae, Spongiibacteraceae, Micavibrionaceae and unclassified  
319 class of Alphaproteobacteria were more abundant in HDPE-OXO samples. We did not identify  
320 families specifically associated with HDPE samples.

321

### 322 3.5. Core microbiome of the plastisphere community

323 To identify the core microbiome of the plastisphere from the deep Southwest Atlantic Ocean, the  
324 shared ASVs among plastic substrate types were examined (Figure 4). A total of 28 ASVs were  
325 shared among plastic types (Table S1), comprising the core microbiome of the plastisphere from  
326 the deep Southwest Atlantic Ocean. These ASVs were classified within 23 bacterial families, while  
327 17 families included 97% of total core microbiome (Figure 4). This families were composed by  
328 Oleiphilaceae (30% of core microbiome), Rhizobiaceae (22%), unclassified Bacteria (13%), NB1-  
329 j (7%), Haliaceae (5%), Hyphomonadaceae (4%), Sneathiellaceae (3%), unclassified Bacteroidia  
330 class (3%), Micrococcaceae (2%), AB1 (1%), OM190 (1%), Thermaceae (1%), Paenibacillaceae  
331 (1%), Haliangiaceae (1%), Microtrichaceae (1%), Nannocystaceae (1%) and Eel-36e1D6 (1%).  
332 Six other families represented approximately 3% of the core microbiome (Figure 4).



### 333 3.6. Cultivable plastic-associated Bacteria

334 Bacterial strains were cultivated from all substrates, including all plastic types and gravel (Table  
335 S2). Overall, 15 strains were affiliated according to their 16S rRNA gene sequences to a bacterial  
336 genus. The most dominant family identified among the strains was Halomonadaceae, recovered  
337 from all substrates. This family was represented by two genera, *Salinicola* and *Halomonas*. Four  
338 families were isolated only from plastic substrates, Flavobacteriaceae (HDPE and HDPE-OXO),  
339 Pseudoalteromonadaceae (HDPE), Marinobacteraceae (HDPE-OXO) and Rhodobacteraceae (PP).  
340 In contrast, Micrococcaceae and Bacillaceae were isolated only from gravel. The comparison of  
341 the sequences of all isolates with the SILVA rRNA database confirmed the identities of the isolates.  
342 A phylogenetic tree was constructed with the bacterial sequences deposited in the database most  
343 closely related to our isolates (Figure S3). All the bacterial genera isolated in this study have been  
344 reported associated with or degrading hydrocarbon compounds (Table S2).

#### 345 **4. Discussion**

346 Deep-sea environments are characterized by low temperatures, high pressure, absence of light and  
347 the consequent absence of photosynthetic primary production (Corinaldesi, 2015). Together with  
348 a general reduction of organic matter input, these extreme conditions promote high selective  
349 pressures on the microbial community. The input of anthropogenic substrates (i.e., sources of  
350 carbon) into the deep sea, such as plastic substrates, creates new habitats (or food sources) to be  
351 colonized by microorganisms. However, the composition of these substrata may select pelagic  
352 microorganisms with specific features that allow them to colonize and metabolize this carbon  
353 source (Dussud et al., 2018a; Dussud et al., 2018b).

354 Although the input of organic matter is suggested to be low, the pool of organic matter in deep  
355 waters could be enough to support high microbial richness (Luna et al., 2012), as indicated by our  
356 results. The highest richness on the gravel samples indicates that more microbial taxa were capable  
357 of attaching to the gravel in comparison with the plastic substrates, suggesting that plastics likely  
358 offer a strong selective pressure to colonization by the surrounding microbial community  
359 (McCormick et al., 2014). This is also supported by the lower microbial evenness observed in the  
360 plastic substrates (Figure S1C). However, statistical differences in alpha-diversity indices between  
361 plastic substrates and AW were not observed. Despite the high variability among samples and a  
362 limited number of replicates, these results indicate that the substrate effect on microbial  
363 communities is reflected by taxonomic composition rather than by diversity indexes. To the best  
364 of our knowledge, there is no previous study that has experimentally addressed the microbial  
365 colonization on plastic substrates in deep waters. Several previous studies have reported on surface  
366 waters (either from laboratory or field experiments) a lower richness and diversity of plastic  
367 substrates in comparison with the surrounding waters, suggesting that plastic substrates select for

368 a specific and less diverse microbial community (McCormick et al., 2014; Ogonowski et al., 2018;  
369 Zettler et al., 2013). Nevertheless, deep water is generally oligotrophic, while surface waters have  
370 a constant input of organic matter from primary production from the phytoplanktonic community  
371 and could support high microbial diversity. These general oligotrophic conditions could also be  
372 attributed to the lack of significant differences in microbial richness and diversity among sites,  
373 which are exposed to the same depths and water mass. Abiotic parameters associated with water  
374 mass are suggested to be the main driver of the microbial community in the pelagic system. The  
375 similarity of these drivers observed among the sites could thus explain the lack of significant  
376 differences found in our study, as well as the high similarity among AW samples from different  
377 sites (Figure 2). Although at different sites, all samples were deployed at the same depth (3300 m),  
378 under similar temperatures (3-4 °C), salinities (34.6-35 psu), oxygen concentrations (above 5 mL  
379 L<sup>-1</sup>) and with similar low nutrient levels (oligotrophic) (Gonzalez-Silvera et al., 2004; Krueger et  
380 al., 2015).

381 Our results showing the strong effect of substrate type on microbial community structure  
382 (PERMANOVA,  $R^2=0.78$ ,  $P < 0.001$ ) indicates niche partitioning of microbial communities  
383 among substrates (Dussud et al., 2018a). The substrate-dependence has been reported by studies  
384 regarding environmental and controlled conditions (Dussud et al., 2018a; Dussud et al., 2018b;  
385 Kirstein et al., 2019, 2018; McCormick et al., 2014; Zettler et al., 2013), showing evidence of the  
386 selective effect of plastic substrates. Under natural environmental conditions, substrate-  
387 dependence has also been reported in studies that randomly collected PMD (Plastic marine debris)  
388 (Didier et al., 2017; Dussud et al., 2018a; Ogonowski et al., 2018; Zettler et al., 2013) or that  
389 deployed plastic substrates (Kirstein et al., 2019), showing that the microbial community attached  
390 to a plastic substrate are distinct from free-living seawater communities or those attached to other

391 hard substrata. Besides the substrate composition, the shape of the plastic particle could also act as  
392 a driver of the microbial diversity. For example, it is possible that the differences in the microbial  
393 structure and composition found between HDPE and PP substrates could also be attributed to shape  
394 differences in the plastics, not only to differences in composition. The HDPE substrate used in our  
395 study was in the form of a film, while the PP was a pellet. Because we didn't have the same plastic  
396 type with multiple shapes available among our samples, we could not evaluate the isolated effect  
397 of plastic shapes on microbial diversity. Some recent studies have indicated that particle shape  
398 affects the microbial biofilm thickness (Wright et al., 2020), but if this reflects in changes in the  
399 microbial community composition is as yet unknown.

400 The microbial communities from gravel samples were more similar to the plastic substrates, while  
401 adjacent water samples were particularly distinct (Figure 2). These results were expected, as the  
402 plastic samples and gravel were deployed for 719 days; water samples represented only a single  
403 moment in time, while the plastic and gravel samples are the results of cell deposition and a  
404 dynamic succession over a long period. The AW samples are therefore a type of control, providing  
405 information on the microbial taxa present in the water column before retrieving the substrates.  
406 Corroborating our results, Oberbeckmann et al., (2016) demonstrated significant differences of  
407 multiple taxonomic groups when comparing plastic biofilm communities and the surrounding  
408 seawater communities; although the bacterial communities attached to PET bottles were distinct  
409 from the free-living seawater communities, the authors also found that PET-associated  
410 communities were similar to other types of particle-associated or glass-bound communities  
411 collected in the surrounding seawater. Those results confirm the ability of pelagic microorganisms  
412 to colonize a range of substrates without specificity (Dussud et al., 2018a).

413 At deeper taxonomic levels, the differences between the plastic and gravel samples were strongly  
414 evident. We identified 37 families significantly more abundant in plastic substrates than in gravel  
415 samples (Figure 2B), such as such as Methylogellaceae, Colwelliaceae, Pseudomonadaceae,  
416 Haliangiaceae, Micrococcaceae, Halieceaea, Oleiphilaceae, Rhizobiaceae, Microtrichaeaed,  
417 Flavobacteriaceae, Rhodobacteraceae and unclassified families of Alpha- and  
418 Gammaproteobacteria. Corroborating our results, previous studies have shown that microplastics  
419 were mainly colonized by Alpha- and Gammaproteobacteria, which were shown to act as primary  
420 colonizers, and Flavobacteria (Bacteroidetes), which appeared to act as secondary colonizers (Lee  
421 et al., 2008). Additionally, bacterial families classified as Flavobacteriaceae, Pirellulaceae,  
422 Rhodobacteraceae (Alphaproteobacteria) and Microtrichaceae (Acidimicrobiia) were identified as  
423 the most dominant families on microplastic (PE) biofilms exposed for 135 days to the marine  
424 environment at 12 m depth (Tu et al., 2020).

425 When comparing our microbial taxa from plastic substrates with previous studies related to the  
426 plastisphere in epipelagic ecosystems we found several families in common, such as  
427 Microtrichaceae, Rhizobiaceae, Halieaceae, Spongiibacteraceae, Rhodobacteraceae,  
428 Micavibrionaceae, Flavobacteriaceae, Halomonadaceae, Kangiellaceae, Hyphomonadaceae,  
429 Comamonadaceae, Oleiphilaceae and Bacillaceae (Amaral-Zettler et al., 2020; Feng et al., 2020;  
430 Pinto et al., 2019; Rogers et al., 2020). The family Oleiphilaceae comprises members that  
431 obligately utilize hydrocarbons through the alkane hydroxylase (*AlkB*) pathway (Golyshin et al.,  
432 2002); its detection in our plastic samples likely indicates their potential role in degrading plastic  
433 substrates in deep-sea ecosystems. Further, among the families described by these authors,  
434 Rhodospirillaceae members were not detected in our samples, which is in agreement with their  
435 photosynthetic capacity and thus their prevalence in epipelagic ecosystems. We detected a few

436 families in our plastic samples which were not identified in these previous studies, such as  
437 Nitrosopumilaceae. Nitrosopumilaceae members are widely distributed in several deep-sea  
438 environments and have an important role as primary producers through ammonia oxidation (Zhong  
439 et al., 2020). Their presence in our plastic substrates likely reflects the high abundance of this  
440 family in these ecosystems, which might favor their attachment to a variety of substrates available  
441 for colonization.

442 Remarkable differences were observed when we grouped the microbial families by their  
443 distributions amongst plastic types as generalists (significantly abundant on all plastic types,  
444 HDPE, HDPE-OXO and PP), HDPE plastic generalists (significantly abundant in HDPE and  
445 HDPE-OXO), and specialists (significantly abundant in specific plastic substrates). Members of  
446 Bdellovibrionaceae, Halieaceae, Microtrichaceae and Pseudomonadaceae families were identified  
447 as generalists. The ability to colonize and potentially metabolize the carbon from plastic polymers  
448 of different substrates in deep environments, under oligotrophic conditions, confer advantages on  
449 these microbes in comparison to the entire microbial community. Some of these families have been  
450 previously described in association with different types of microplastics from several locations  
451 (e.g. Dussud et al., 2018a; Jiang et al., 2018; Tu et al., 2020). Tu et al., (2020) found a high  
452 abundance of Microtrichaceae members within biofilms of polyethylene microplastics from coastal  
453 seawater in the Yellow Sea, China, with increasing abundance according to longer exposure  
454 periods (135 days). Halieaceae members were detected in polyethylene, polypropylene and  
455 polystyrene microplastics from the Yangtze estuary (Jiang et al., 2018) and polyethylene  
456 microplastics from the Yellow Sea (Tu et al., 2020), both in China. This family is composed by  
457 marine bacteria that are capable of assimilating propylene through alkene monooxygenase genes  
458 (Suzuki et al., 2019). In addition, we observed microbial families associated specifically to HDPE

459 samples (with and without biodegradable additives). Those microbes, in contrast to the generalist  
460 group, are suggested to be more adaptive to colonizing HDPE polymers, with weak or no influence  
461 from biodegradable additives. The influence of biodegradable additives was observed in the  
462 specialist taxa group (i.e. those microbes more adapted to a specific polymer type). The presence  
463 of additives in the polymer compositions may support microbial dynamics over time (Dussud et  
464 al., 2018b). Additionally, those additives could be an extra source of nutrients that may reflect in  
465 the multiplication of the different microorganisms. Similar results were reported by Dussud et al.,  
466 (2018b) that suggested a strong effect of the polymer type on the bacterial community, because the  
467 composition of microbial biofilm on LDPE and LDPE-OXO (PE with pro-oxidant additives) was  
468 completely distinct, while AA-LDPE-OXO (artificially aged LDPE-OXO) and PHBV (poly(3-  
469 hydroxybutyrate- co-3-hydroxyvalerate) showed higher similarity, all under controlled conditions.  
470 As observed by these authors for shallow waters, we also observed an influence of the plastic types  
471 HDPE and HDPE-OXO on selecting specific microbial taxa in deep waters.

472 A total of 28 ASVs were identified as core microbiome members in the plastisphere. Defining a  
473 common core microbiome in the plastisphere across different studies may be difficult, because  
474 variations between experimental designs make it difficult to compare studies directly, as do the  
475 variety of study-specific approaches used to define the core (Didier et al., 2017; Tu et al., 2020;  
476 Zettler et al., 2013). However, some taxa observed in our study were widely described by previous  
477 studies, which provides evidence of common core members of the plastisphere from both surface  
478 and deep waters. ASVs from the bacterial families Oleiphilaceae and Hyphomonadaceae were  
479 found as members of the core microbiome in our plastic samples. These families have members  
480 known to degrade hydrocarbons (Golyshin et al., 2002; Ozaki et al., 2007) or are frequently

481 associated to plastic substrates in the marine environment (Bryant et al., 2016; De Tender et al.,  
482 2017; Oberbeckmann et al., 2018; Pinto et al., 2019; Zettler et al., 2013).

483 In addition, taxa reported from plastic substrates, but not in the core microbiome were also  
484 identified. For instance, Microtrichaceae were reported as a dominant taxon on a PE surface during  
485 the early phase of biofilm formation (Tu et al., 2020) and Sneathiellaceae colonized plastic debris  
486 along a transect through the North Pacific Subtropical Gyre (Bryant et al., 2016). Notably, taxa not  
487 previously described from plastic substrates were also identified. Micrococcaceae is a well-  
488 documented bacterial family inhabiting deep-sea sediments (Chen et al., 2005, 2016; Sass et al.,  
489 2001); their members were already identified in sediments from the Southwest Indian Ridge at  
490 depths ranging from 1,662 to 4,000 m (Chen et al., 2016), in a hypersaline 3,500 m depth site in  
491 the Mediterranean Sea (Sass et al., 2001), and were isolated from an Antarctic lake and deep-sea  
492 sediments from the tropical West Pacific (Chen et al., 2005). *Allorhizobium-Neorhizobium-*  
493 *Pararhizobium-Rhizobium* spp. (Rhizobiaceae), a taxon reported as nitrogen-fixing (Franche et al.,  
494 2009), was an abundant member of the core microbiome. The family Rhizobiaceae is commonly  
495 involved in plant-microbe interactions and was reported recently in marine environments (Kimes  
496 et al., 2015). In deep-sea environments, the species of Rhizobiaceae *Georhizobium profundum* was  
497 isolated from sediment collected at 4,524 m depth (Cao et al., 2020), but its association with plastic  
498 substrata were only described in freshwater environments (Wang et al., 2020; Wen et al., 2020).  
499 Moreover, another taxa that comprised our core microbiome was NB1-j, an uncultivated bacterial  
500 family that was previously found in Japan Trench sediment at 6,292 m depth (Yanagibayashi et  
501 al., 1999), and in 800 to 1,450 m depth sediments heavily impacted by an oil spill in the northern  
502 Gulf of Mexico (Handam et al., 2018). Finally, taxa from AB1 family (previously assigned as  
503 unclassified Alphaproteobacteria) and Eel-36e1D6 (previously assigned as unclassified



504 environmental clone groups), which also comprised the core microbiome, were reported in deep-  
505 sea hydrothermal fields, as well as in ferromanganese crusts (Nitahara et al., 2011). Overall, these  
506 results highlight a significant number of deep-sea taxonomic groups that were not described by  
507 previous studies inhabiting the plastic substrates but were found inhabiting our plastic substrates  
508 in the deep SW Atlantic Ocean.

509 We identified some taxa in the core microbiome that might be potentially related to plastic  
510 degradation, according to previous studies. For example, *Arthrobacter* spp. (Micrococcaceae)  
511 isolated from plastic waste in the Gulf of Mannar, India, was reported degrading high-density  
512 polyethylene (HDPE); after 30 days incubation, they had reduced the weight of the substrate by  
513 12% (Balasubramanian et al., 2010). In addition, members of the Halieaceae family that have  
514 known capabilities of assimilating propylene through alkene monooxygenase genes (Suzuki et al.,  
515 2019), were described in plastic substrates from the Yangtze estuary (Jiang et al., 2018) and Yellow  
516 Sea (Tu et al., 2020), both in China. Members of the Paenibacillaceae family, such as *Paenibacillus*  
517 spp. have shown high potential to degrade LPDE and HDPE when in consortia with *Pseudomonas*  
518 spp., *Stenotrophomonas* spp. and *Bacillus* spp. (Skariyachan et al., 2017). Furthermore, we were  
519 able to isolate bacteria from our plastic substrates that comprise families and genera previously  
520 described as colonizing or degrading hydrocarbon substrates (Table S2). The isolation of these  
521 bacteria indicates that they were at least viable in deep-sea conditions and are important members  
522 to be explored in future studies to reveal their plastic-degradation capacity.

523 Information about microbial communities associated with the plastic substrata in the deep-ocean  
524 is scarce in published research studies (Krause et al., 2020; Woodall et al., 2018). Additionally,  
525 results from other experiments deploying samples for a long period in deep sea environments have  
526 not yet been published to date. Our pioneer study showed that several taxonomic groups previously

527 described as plastic colonizers in surface waters seem to also colonize the plastic substrates in the  
528 deep sea. However, we also identified some groups in the plastisphere that are typically found  
529 inhabiting deep-sea sediments, such as NB1-j, Rhizobiaceae and Eel-36e1D6 members, most of  
530 them still poorly characterized and not yet cultivated. In addition, 13% of taxa in the core  
531 microbiome were not classified to any microorganism previously deposited in the reference  
532 databases, which might indicate sequencing artefacts or that we identified potential novel groups  
533 not yet described. Our study addresses the gap in the knowledge of microbial colonization in  
534 plastics deployed for a long period in the deep sea, highlighting the taxa potentially involved with  
535 plastic degradation processes. However, further studies are needed to better understand their role  
536 in plastic colonization and degradation in deep-sea ecosystems.

537 In summary, this study reported for the first time that deep-sea microbial communities of the  
538 Southwest Atlantic Ocean are involved in the colonization of plastic substrates. Furthermore, the  
539 microbial community colonizing the plastic surfaces were distinct and dependent on polymer type,  
540 but the site where the samples were deployed had no effect on the microbial community. Our  
541 results demonstrated a core microbiome exclusively composed of low abundance taxa; some  
542 members were not previously described as associated with plastic substrates, while other bacterial  
543 families had previously been described degrading plastics, but not in deep-sea environments.  
544 Additionally, we were able to cultivate and isolate some of these bacterial families from our plastic  
545 substrates. Our results indicate that a specific microbial community from the deep-sea can attach,  
546 colonize and potentially degrade plastic substrates. It is important to note that some of those  
547 members were reported degrading plastics in controlled conditions, and their ability to degrade the  
548 plastic compounds under deep-water conditions remains unknown without further investigation.  
549 We provide the first evidence of an unexplored microbial community inhabiting the deep-sea

550 plastisphere, which may be used as a baseline to future studies about the functionality and the  
551 potential of degradation of these microbial communities living in oligotrophic conditions, in the  
552 absence of sunlight, under high pressure and low temperature.

553

#### 554 **CRedit authorship contribution statement**

555 **Luana Agostini:** Conceptualization, Methodology, Investigation, Data curation, Writing - original  
556 draft, review & editing. **Julio Cezar Fornazier Moreira:** Formal analysis, Data curation, Writing  
557 - original draft, review & editing, Visualization. **Amanda Gonçalves Bendia:** Formal analysis,  
558 Writing - original draft, review & editing, Visualization. **Maria Carolina Pezzo Kmit:** Writing -  
559 original draft, review & editing. **Linda Gwen Waters:** Conceptualization, Methodology,  
560 Investigation, Writing - review & editing. **Marina Ferreira Mourão Santana:** Conceptualization,  
561 Methodology, Investigation, Writing - review & editing. **Paulo Yukio Gomes Sumida:**  
562 Conceptualization, Methodology, Writing - review & editing, Project administration, Funding  
563 acquisition. **Alexander Turra:** Conceptualization, Methodology, Writing - review & editing,  
564 Project administration, Funding acquisition. **Vivian Helena Pellizari:** Conceptualization,  
565 Methodology, Writing - review & editing, Supervision.

566 **Acknowledgments**

567 This work has been funded by the São Paulo Research Foundation (FAPESP), project BioSuOr  
568 grant #2011/50185-1. This study was financed in part by the Coordenação de Aperfeiçoamento de  
569 Pessoal de Nível Superior - Brazil (CAPES) - Finance Code 001. LA was funded by CAPES. The  
570 authors would like to thank the crew of R/V Alpha Crucis and R/V Alpha Delphini from IOUSP,  
571 and the crew of PRV Almirante Maximiano (H41) from Brazilian Navy for sampling and Rosa C.  
572 Gamba and LECOM's research team for all scientific support and assistance in the lab. We also  
573 acknowledge the support of the National Council for Scientific and Technological Development  
574 (CNPq) for scholarship grants to AT (#309697/2015-8 and #310553/2019-9) and LW (No.  
575 150159/2015-3).

576 **References**

- 577 Amaral-Zettler, L.A., Zettler, E.R., Mincer, T.J., 2020. Ecology of the plastisphere. *Nat. Rev.*  
578 *Microbiol.* 18, 139–151. <https://doi.org/10.1038/s41579-019-0308-0>
- 579 Anderson, M.J., 2001. A new method for non-parametric multivariate analysis of variance. *Austral*  
580 *Ecol.* 32–46.
- 581 Bergmann, M., Klages, M., 2012. Increase of litter at the Arctic deep-sea observatory  
582 HAUSGARTEN. *Mar. Pollut. Bull.* 64, 2734–2741.  
583 <https://doi.org/10.1016/j.marpolbul.2012.09.018>
- 584 Bolyen, E., Rideout, J.R., Dillon, M.R., et al., 2019. Reproducible, interactive, scalable and  
585 extensible microbiome data science using QIIME 2. *Nat. Biotechnol.* 37, 852–857.  
586 <https://doi.org/10.1038/s41587-019-0209-9>
- 587 Bryant, J. A., Clemente, T.M., Viviani, D.A., Fong, A.A., Thomas, K.A., Kemp, P., Karl, D.M.,  
588 White, A.E., DeLong, E.F., 2016. Diversity and Activity of Communities Inhabiting Plastic Debris  
589 in the North Pacific Gyre. *mSystems* 1, 1–19. <https://doi.org/10.1128/msystems.00024-16>
- 590 Callahan, B.J., McMurdie, P.J., Rosen, M.J., Han, A.W., Johnson, A.J.A., Holmes, S.P., 2016.  
591 DADA2: High-resolution sample inference from Illumina amplicon data. *Nat. Methods* 13, 581–  
592 583. <https://doi.org/10.1038/nmeth.3869>
- 593 Cao, J., Wei, Y., Lai, Q., Wu, Y., Deng, J., Li, J., Liu, R., Wang, L., Fang, J., 2020. *Georhizobium*  
594 *profundi* gen. Nov., sp. nov., a piezotolerant bacterium isolated from a deep-sea sediment sample  
595 of the New Britain Trench. *Int. J. Syst. Evol. Microbiol.* 70, 373–379.  
596 <https://doi.org/10.1099/ijsem.0.003766>
- 597 Caporaso, J.G., Lauber, C.L., Walters, W.A., Berg-lyons, D., Lozupone, C.A., Turnbaugh, P.J.,  
598 Fierer, N., Knight, R., 2010. Global patterns of 16S rRNA diversity at a depth of millions of  
599 sequences per sample. *Proceedings of the national academy of sciences*, 108(Supplement 1), 4516–  
600 4522. <https://doi.org/10.1073/pnas.1000080107>
- 601 Carson, H.S., Nerheim, M.S., Carroll, K.A., Eriksen, M., 2013. The plastic-associated  
602 microorganisms of the North Pacific Gyre. *Mar. Pollut. Bull.* 75, 126–132.  
603 <https://doi.org/10.1016/j.marpolbul.2013.07.054>
- 604 Chen, M., Xiao, X., Wang, P., Zeng, X., Wang, F., 2005. *Arthrobacter ardleyensis* sp. nov., isolated  
605 from Antarctic lake sediment and deep-sea sediment. *Arch. Microbiol.* 183, 301–305.  
606 <https://doi.org/10.1007/s00203-005-0772-y>

- 607 Chen, P., Zhang, L., Guo, X., Dai, X., Liu, L., Xi, L., Wang, J., Song, L., Wang, Y., Zhu, Y.,  
608 Huang, L., Huang, Y., 2016. Diversity, biogeography, and biodegradation potential of  
609 actinobacteria in the deep-sea sediments along the southwest Indian ridge. *Front. Microbiol.* 7, 1–  
610 17. <https://doi.org/10.3389/fmicb.2016.01340>
- 611 Chiba, S., Saito, H., Fletcher, R., Yogi, T., Kayo, M., Miyagi, S., Ogido, M., Fujikura, K., 2018.  
612 Human footprint in the abyss: 30 year records of deep-sea plastic debris. *Mar. Policy* 0–1.  
613 <https://doi.org/10.1016/j.marpol.2018.03.022>
- 614 Cole, M., Lindeque, P., Halsband, C., Galloway, T.S., 2011. Microplastics as contaminants in the  
615 marine environment: A review. *Mar. Pollut. Bull.* 62, 2588–2597.  
616 <https://doi.org/10.1016/j.marpolbul.2011.09.025>
- 617 Conway, J.R., Lex, A., Gehlenborg, N., 2017. UpSetR: An R package for the visualization of  
618 intersecting sets and their properties. *Bioinformatics* 33, 2938–2940.  
619 <https://doi.org/10.1093/bioinformatics/btx364>
- 620 Corinaldesi, C., 2015. New perspectives in benthic deep-sea microbial ecology. *Front. Mar. Sci.* 2,  
621 1–12. <https://doi.org/10.3389/fmars.2015.00017>
- 622 Dang, H., and Lovell, C. R. (2016). Microbial surface colonization and biofilm development in  
623 marine environments. *Microbiology and Molecular Biology Reviews*, 80(1), 91-138.
- 624 De Tender, C.A., Devriese, L.I., Haegeman, A., Maes, S., Ruttink, T., Dawyndt, P., 2015. Bacterial  
625 Community Profiling of Plastic Litter in the Belgian Part of the North Sea. *Environ. Sci. Technol.*  
626 49, 9629–9638. <https://doi.org/10.1021/acs.est.5b01093>
- 627 De Tender, C., Schlundt, C., Devriese, L.I., Mincer, T.J., Zettler, E.R., Amaral-Zettler, L.A., 2017.  
628 A review of microscopy and comparative molecular-based methods to characterize “Plastisphere”  
629 communities. *Anal. Methods* 9, 2132–2143. <https://doi.org/10.1039/C7AY00260B>
- 630 Didier, D., Anne, M., Alexandra, T.H., 2017. Plastics in the North Atlantic garbage patch: A boat-  
631 microbe for hitchhikers and plastic degraders. *Sci. Total Environ.* 599–600, 1222–1232.  
632 <https://doi.org/10.1016/j.scitotenv.2017.05.059>
- 633 Dussud, C., Meistertzheim, A.L., Conan, P., Pujo-Pay, M., George, M., Fabre, P., Coudane, J.,  
634 Higgs, P., Elineau, A., Pedrotti, M.L., Gorsky, G., Ghiglione, J.F., 2018a. Evidence of niche  
635 partitioning among bacteria living on plastics, organic particles and surrounding seawaters.  
636 *Environ. Pollut.* 236, 807–816. <https://doi.org/10.1016/j.envpol.2017.12.027>
- 637 Dussud, Claire, Hudec, C., George, M., Fabre, P., Higgs, P., Bruzard, S., Delort, A.M.,  
638 Eyheraguibel, B., Meistertzheim, A.L., Jacquin, J., Cheng, J., Callac, N., Odobel, C., Rabouille,

- 639 S., Ghiglione, J.F., 2018b. Colonization of non-biodegradable and biodegradable plastics by  
640 marine microorganisms. *Front. Microbiol.* 9, 1–13. <https://doi.org/10.3389/fmicb.2018.01571>
- 641 Eriksen, M., Lebreton, L.C.M., Carson, H.S., Thiel, M., Moore, C.J., Borerro, J.C., Galgani, F.,  
642 Ryan, P.G., Reisser, J., 2014. Plastic Pollution in the World’s Oceans: More than 5 Trillion Plastic  
643 Pieces Weighing over 250,000 Tons Afloat at Sea. *PLoS One* 9, 1–15.  
644 <https://doi.org/10.1371/journal.pone.0111913>
- 645 Feng, L., He, L., Jiang, S., Chen, J., Zhou, C., Qian, Z.J., Hong, P., Sun, S., Li, C., 2020.  
646 Investigating the composition and distribution of microplastics surface biofilms in coral areas.  
647 *Chemosphere* 252, 126565. <https://doi.org/10.1016/j.chemosphere.2020.126565>
- 648 Franche, C., Lindström, K., Elmerich, C., 2009. Nitrogen-fixing bacteria associated with  
649 leguminous and non-leguminous plants. *Plant Soil* 321, 35–59. [https://doi.org/10.1007/s11104-](https://doi.org/10.1007/s11104-008-9833-8)  
650 [008-9833-8](https://doi.org/10.1007/s11104-008-9833-8)
- 651 Galgani, F., Souplet, A., Cadiou, Y., 1996. Accumulation of debris on the deep sea floor off the  
652 French Mediterranean coast. *Mar. Ecol. Prog. Ser.* 142, 225–234.
- 653 GESAMP, 2019. Guidelines on the monitoring and assessment of plastic litter and microplastics in  
654 the ocean (Kershaw P.J., Turra A. and Galgani F. editors). *Rep. Stud. GESAMP* 99, 130.
- 655 Golyshin, P.N., Chernikova, Ta.N., Abraham, W.R., Lünsdorf, H., Timmis, K.N., Yakimov, M.M.,  
656 2002. *Oleiphilaceae* fam. nov., to include *Oleiphilus messinensis* gen. nov., sp. nov., a novel  
657 marine bacterium that obligately utilizes hydrocarbons. *Int. J. Syst. Evol. Microbiol.* 52, 901–911.  
658 <https://doi.org/10.1099/ijs.0.01890-0>
- 659 Gonzalez-Silvera, A., Santamaria-Del-Angel, E., Garcia, V.M.T., Garcia, C.A.E., Millán-Nuñez,  
660 R., Muller-Karger, F., 2004. Biogeographical regions of the tropical and subtropical Atlantic  
661 Ocean off South America: Classification based on pigment (CZCS) and chlorophyll-a (SeaWiFS)  
662 variability. *Cont. Shelf Res.* 24, 983–1000. <https://doi.org/10.1016/j.csr.2004.03.002>
- 663 Hamdan, L.J., Salerno, J.L., Reed, A., Joye, S. B., Damour, M. The impact of the Deepwater  
664 Horizon blowout on historic shipwreck-associated sediment microbiomes in the northern Gulf of  
665 Mexico. *Sci Rep* 8, 9057 (2018). <https://doi.org/10.1038/s41598-018-27350-z>
- 666 Jambeck, J.R., Geyer, R., Wilcox, C., Siegler, T.R., Perryman, M., Andrady, A., Narayan, R., Law,  
667 K.L., 2015. Plastic waste inputs from land into the ocean. *Science* (80-. ). 347, 768–771.  
668 <https://doi.org/10.1126/science.1260352>



- 669 Jiang, P., Zhao, S., Zhu, L., Li, D., 2018. Microplastic-associated bacterial assemblages in the  
670 intertidal zone of the Yangtze Estuary. *Sci. Total Environ.* 624, 48–54.  
671 <https://doi.org/10.1016/j.scitotenv.2017.12.105>
- 672 Kimes, N.E., López-Pérez, M., Flores-Félix, J.D., Ramírez-Bahena, M.H., Igual, J.M., Peix, A.,  
673 Rodríguez-Valera, F., Velázquez, E., 2015. *Pseudorhizobium pelagicum* gen. nov., sp. nov.  
674 isolated from a pelagic Mediterranean zone. *Syst. Appl. Microbiol.* 38, 293–299.  
675 <https://doi.org/10.1016/j.syapm.2015.05.003>
- 676 Kirstein, I.V., Wichels, A., Gullans, E., Krohne, G., Gerdts, G., 2019. The plastisphere –  
677 Uncovering tightly attached plastic “specific” microorganisms. *PLoS One* 14, 1–17.  
678 <https://doi.org/10.1371/journal.pone.0215859>
- 679 Kirstein, I. V., Wichels, A., Krohne, G., Gerdts, G., 2018. Mature biofilm communities on  
680 synthetic polymers in seawater - Specific or general? *Mar. Environ. Res.* 147–154.  
681 <https://doi.org/10.1016/j.marenvres.2018.09.028>
- 682 Krause, S., Molari, M., Gorb, E. V., Gorb, S.N., Kossel, E., Haeckel, M., 2020. Persistence of  
683 plastic debris and its colonization by bacterial communities after two decades on the abyssal  
684 seafloor. *Sci. Rep.* 10, 1–15. <https://doi.org/10.1038/s41598-020-66361-7>
- 685 Krueger, M.C., Harms, H., Schlosser, D., 2015. Prospects for microbiological solutions to  
686 environmental pollution with plastics. *Appl. Microbiol. Biotechnol.* 99, 8857–8874.  
687 <https://doi.org/10.1007/s00253-015-6879-4>
- 688 Kumar, S., Stecher, G., Li, M., Knyaz, C., Tamura, K., 2018. MEGA X: Molecular evolutionary  
689 genetics analysis across computing platforms. *Mol. Biol. Evol.* 35, 1547–1549.  
690 <https://doi.org/10.1093/molbev/msy096>
- 691 Lee, J.W., Nam, J.H., Kim, Y.H., Lee, K.H., Lee, D.H., 2008. Bacterial communities in the initial  
692 stage of marine biofilm formation on artificial surfaces. *J. Microbiol.* 46, 174–182.  
693 <https://doi.org/10.1007/s12275-008-0032-3>
- 694 Love, M.I., Anders, S., Huber, W., 2014. Differential analysis of count data - the DESeq2 package,  
695 *Genome Biology.* <https://doi.org/110.1186/s13059-014-0550-8>
- 696 Luna, G.M., Bianchelli, S., Decembrini, F., De Domenico, E., Danovaro, R., Dell’Anno, A., 2012.  
697 The dark portion of the Mediterranean Sea is a bioreactor of organic matter cycling. *Global*  
698 *Biogeochem. Cycles* 26, 1–14. <https://doi.org/10.1029/2011GB004168>



- 699 McCormick, A., Hoellein, T.J., Mason, S.A., Schlupe, J., Kelly, J.J., 2014. Microplastic is an  
700 abundant and distinct microbial habitat in an urban river. *Environ. Sci. Technol.* 48, 11863–11871.  
701 <https://doi.org/10.1021/es503610r>
- 702 Nitahara, S., Kato, S., Urabe, T., Usui, A., Yamagishi, A., 2011. Molecular characterization of the  
703 microbial community in hydrogenetic ferromanganese crusts of the Takuyo-Daigo Seamount,  
704 northwest Pacific. *FEMS Microbiol. Lett.* 321, 121–129. [https://doi.org/10.1111/j.1574-  
705 6968.2011.02323.x](https://doi.org/10.1111/j.1574-6968.2011.02323.x)
- 706 Oberbeckmann, S., Labrenz, M., 2020. Marine Microbial Assemblages on Microplastics:  
707 Diversity, Adaptation, and Role in Degradation. *Ann. Rev. Mar. Sci.* 12, 209–232.  
708 <https://doi.org/10.1146/annurev-marine-010419-010633>
- 709 Oberbeckmann, S., Kreikemeyer, B., Labrenz, M., et al., 2018. Interactions of microplastic debris  
710 throughout the marine ecosystem. *Front. Microbiol.* 1, 1–8. [https://doi.org/10.1038/s41559-017-  
711 0116](https://doi.org/10.1038/s41559-017-0116-0116)
- 712 Oberbeckmann, S., Kreikemeyer, B., Labrenz, M., 2017. Environmental factors support the  
713 formation of specific bacterial assemblages on microplastics. *Front. Microbiol.* 8, 2709.  
714 <https://doi.org/10.3389/FMICB.2017.02709>
- 715 Oberbeckmann, S., Osborn, A.M., Duhaime, M.B., 2016. Microbes on a Bottle : Substrate , Season  
716 and Geography Influence Community Composition of Microbes Colonizing Marine Plastic Debris.  
717 *PLoS One* 1–24. <https://doi.org/10.1371/journal.pone.0159289>
- 718 Ogonowski, M., Motiei, A., Ininbergs, K., Hell, E., Gerdes, Z., Udekwu, K.I., Bacsik, Z.,  
719 Gorokhova, E., 2018. Evidence for selective bacterial community structuring on microplastics.  
720 *Environ. Microbiol.* <https://doi.org/10.1111/1462-2920.14120>
- 721 Ozaki, S., Kishimoto, N., Fujita, T., 2007. Change in the Predominant Bacteria in a Microbial  
722 Consortium Cultured on Media Containing Aromatic and Saturated Hydrocarbons as the Sole  
723 Carbon Source. *Microbes Environ.* 22, 128–135. <https://doi.org/10.1264/jsme2.22.128>
- 724 Pierdomenico, M., Casalbore, D., Chiocci, F.L., 2019. Massive benthic litter funnelled to deep sea  
725 by flash-flood generated hyperpycnal flows. *Sci. Rep.* 9, 1–10. [https://doi.org/10.1038/s41598-  
726 019-41816-8](https://doi.org/10.1038/s41598-019-41816-8)
- 727 Pinnell, L.J., Turner, J.W., 2019. Shotgun metagenomics reveals the benthic microbial community  
728 response to plastic and bioplastic in a coastal marine environment. *Front. Microbiol.* 10.  
729 <https://doi.org/10.3389/fmicb.2019.01252>

- 730 Pinto, M., Langer, T.M., Hüffer, T., Hofmann, T., Herndl, G.J., 2019. The composition of bacterial  
731 communities associated with plastic biofilms differs between different polymers and stages of  
732 biofilm succession. *PLoS One* 14, 1–20. <https://doi.org/10.1371/journal.pone.0217165>
- 733 PlasticEurope, 2019. *Plastics-the Facts 2019 – An analysis of European plastics production,*  
734 *demand and waste data.*
- 735 Quero, G.M., Luna, G.M., 2017. Surfing and dining on the “plastisphere”: Microbial life on plastic  
736 marine debris. *Adv. Oceanogr. Limnol.* 8, 199–207. <https://doi.org/10.4081/AIOL.2017.7211>
- 737 Roager, L., Sonnenschein, E.C., 2019. Bacterial Candidates for Colonization and Degradation of  
738 Marine Plastic Debris. *Environ. Sci. Technol.* 53, 11636–11643.  
739 <https://doi.org/10.1021/acs.est.9b02212>
- 740 Roesch, L.F.W., Dobbler, P.T., Pylro, V.S., Kolaczowski, B., Drew, J.C., Triplett, E.W., 2020.  
741 pime: A package for discovery of novel differences among microbial communities. *Mol. Ecol.*  
742 *Resour.* 20, 415–428. <https://doi.org/10.1111/1755-0998.13116>
- 743 Rogers, K.L., Carreres-Calabuig, J.A., Gorokhova, E., Posth, N.R., 2020. Micro-by-micro  
744 interactions: How microorganisms influence the fate of marine microplastics. *Limnol. Oceanogr.*  
745 *Lett.* 5, 18–36. <https://doi.org/10.1002/lo2.10136>
- 746 Sass, A. M., Sass, H., Coolen, M. J. L., Cypionka, H., Overmann, J. (2001). Microbial  
747 Communities in the Chemocline of a Hypersaline Deep-Sea Basin (Urania Basin, Mediterranean  
748 Sea). *Applied and Environmental Microbiology*, 67(12), 5392–5402.  
749 <https://doi.org/10.1128/AEM.67.12.5392-5402.2001>
- 750 Skariyachan, S., Setlur, A.S., Naik, S.Y., Naik, A. A., Usharani, M, Vasist, K. S. Enhanced  
751 biodegradation of low and high-density polyethylene by novel bacterial consortia formulated from  
752 plastic-contaminated cow dung under thermophilic conditions. *Environ Sci Pollut Res* 24, 8443–  
753 8457 (2017). <https://doi.org/10.1007/s11356-017-8537-0>
- 754 Schlining, K., von Thun, S., Kuhnz, L., Schlining, B., Lundsten, L., Jacobsen Stout, N., Chaney,  
755 L., Connor, J., 2013. Debris in the deep: Using a 22-year video annotation database to survey  
756 marine litter in Monterey Canyon, central California, USA. *Deep. Res. Part I Oceanogr. Res. Pap.*  
757 79, 96–105. <https://doi.org/10.1016/j.dsr.2013.05.006>
- 758 Schmidt, C., Krauth, T., Wagner, S., 2017. Export of Plastic Debris by Rivers into the Sea. *Environ.*  
759 *Sci. Technol.* 51, 12246–12253. <https://doi.org/10.1021/acs.est.7b02368>
- 760 Sekiguchi, T., Sato, T., Enoki, M., Kanehiro, H., Kato, C., 2010. Procedure for isolation of the  
761 plastic degrading piezophilic bacteria from deep-sea environments. *J. Japanese Soc. Extrem.* 9,  
762 25–30.

- 763 Shade, A., Handelsman, J., 2012. Beyond the Venn diagram: The hunt for a core microbiome.  
764 *Environ. Microbiol.* 14, 4–12. <https://doi.org/10.1111/j.1462-2920.2011.02585.x>
- 765 Suzuki, T., Yazawa, T., Morishita, N., Maruyama, A., Fuse, H., 2019. Genetic and physiological  
766 characteristics of a novel marine propylene-assimilating halieaceae bacterium isolated from  
767 seawater and the diversity of its alkene and epoxide metabolism genes. *Microbes Environ.* 34, 33–  
768 42. <https://doi.org/10.1264/jsme2.ME18053>
- 769 Tu, C., Chen, T., Zhou, Q., Liu, Y., Wei, J., Waniek, J.J., Luo, Y., 2020. Biofilm formation and its  
770 influences on the properties of microplastics as affected by exposure time and depth in the  
771 seawater. *Sci. Total Environ.* 734. <https://doi.org/10.1016/j.scitotenv.2020.139237>
- 772 Urbanek, A.K., Rymowicz, W., Mironczuk, A.M., 2018. Degradation of plastics and plastic-  
773 degrading bacteria in cold marine habitats. *Appl. Microbiol. Biotechnol.* 102, 7669–7678.  
774 <https://doi.org/doi.org/10.1007/s00253-018-9195-y>
- 775 Van Cauwenberghe, L., Vanreusel, A., Mees, J., Janssen, C.R., 2013. Microplastic pollution in  
776 deep-sea sediments. *Environ. Pollut.* 182, 495–499. <https://doi.org/10.1016/j.envpol.2013.08.013>
- 777 Wang, L., Luo, Z., Zhen, Z., Yan, Y., Yan, C., Ma, X., Sun, L., Wang, M., Zhou, X., Hu, A., 2020.  
778 Bacterial community colonization on tire microplastics in typical urban water environments and  
779 associated impacting factors. *Environ. Pollut.* 265, 114922.  
780 <https://doi.org/10.1016/j.envpol.2020.114922>
- 781 Wen, B., Liu, J.H., Zhang, Y., Zhang, H.R., Gao, J.Z., Chen, Z.Z., 2020. Community structure and  
782 functional diversity of the plastisphere in aquaculture waters: Does plastic color matter? *Sci. Total*  
783 *Environ.* 740, 140082. <https://doi.org/10.1016/j.scitotenv.2020.140082>
- 784 Woodall, L.C., Jungblut, A.D., Hopkins, K., Hall, A., Robinson, F., Gwinnett, C., Paterson, G.L.J.,  
785 2018. Deep-sea anthropogenic macrodebris harbours rich and diverse communities of bacteria and  
786 archaea. *PLoS One* 1–11. <https://doi.org/10.1371/journal.pone.0206220>
- 787 Woodall, L.C., Sanchez-vidal, A., Paterson, G.L.J., Coppock, R., Sleight, V., Calafat, A., Rogers,  
788 A.D., Narayanaswamy, B.E., Thompson, R.C., 2014. The deep sea is a major sink for microplastic  
789 debris. *R. Soc. Open Sci.* 1. <https://doi.org/http://dx.doi.org/10.1098/rsos.140317>
- 790 Wright, R. J., Erni-Cassola, G., Zadjelovic, V., Latva, M., & Christie-Oleza, J. A. (2020). Marine  
791 Plastic Debris: A New Surface for Microbial Colonization. *Environmental Science & Technology*,  
792 54(19), 11657-11672. <https://doi.org/10.1021/acs.est.0c02305>

- 793 Yanagibayashi, M., Nogi, Y., Li, L., Kato, C., 1999. Changes in the microbial community in Japan  
794 Trench sediment from a depth of 6292 m during cultivation without decompression. *FEMS*  
795 *Microbiol. Lett.* 170, 271–279. [https://doi.org/10.1016/S0378-1097\(98\)00556-4](https://doi.org/10.1016/S0378-1097(98)00556-4)
- 796 Zettler, E.R., Mincer, T.J., Amaral-Zettler, L.A., 2013. Life in the “ Plasticsphere ”: Microbial  
797 Communities on Plastic Marine Debris. *Environ. Sci. Technol.* 47, 7137–7146.  
798 <https://doi.org/dx.doi.org/10.1021/es401288x>
- 799 Zhong, H., Lehtovirta-Morley, L., Liu, J., Zheng, Y., Lin, H., Song, D., Todd, J., Tian, J., Zhang,  
800 X.-H., 2020. Novel insights into the Thaumarchaeota in the deepest oceans: their metabolism and  
801 potential adaptation mechanisms 1–16. <https://doi.org/10.21203/rs.3.rs-16227/v2>

802 **Figures**

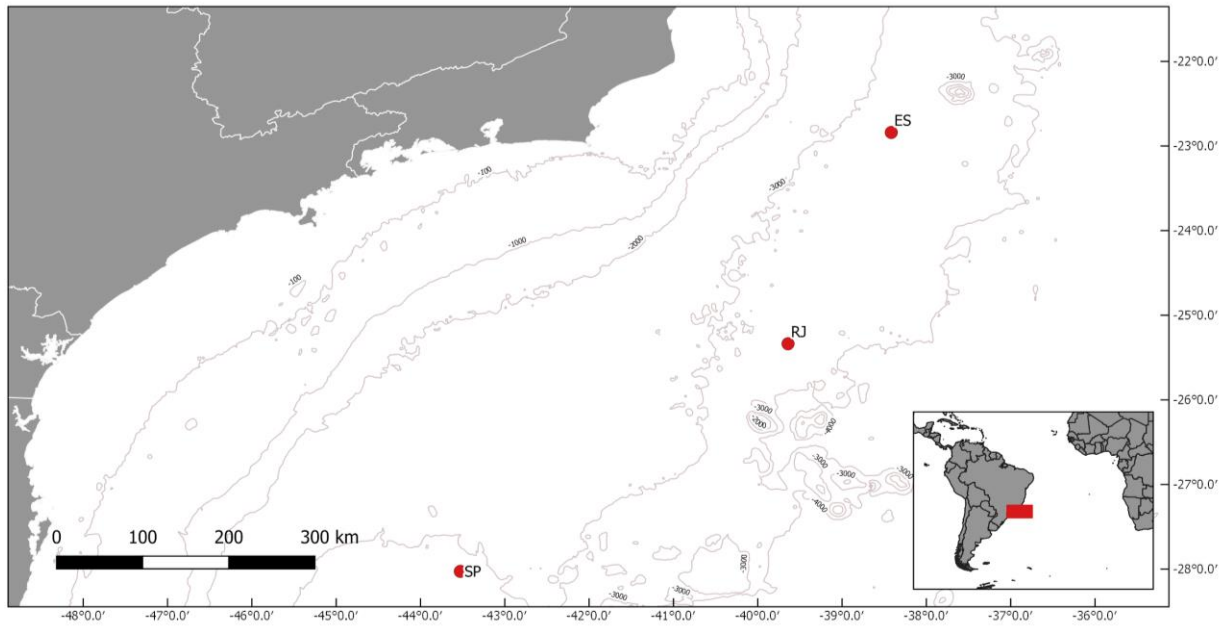

803

804 **Figure 1:** Map of the study region (Southwestern Atlantic) indicating the three experimental sites  
805 where the landers were deployed (red dots), all placed along the 3,300 meter bathymetric line.  
806 Sites: ES, Espírito Santo; RJ, Rio de Janeiro; SP, São Paulo. Source: GeoMapApp®.

807

808

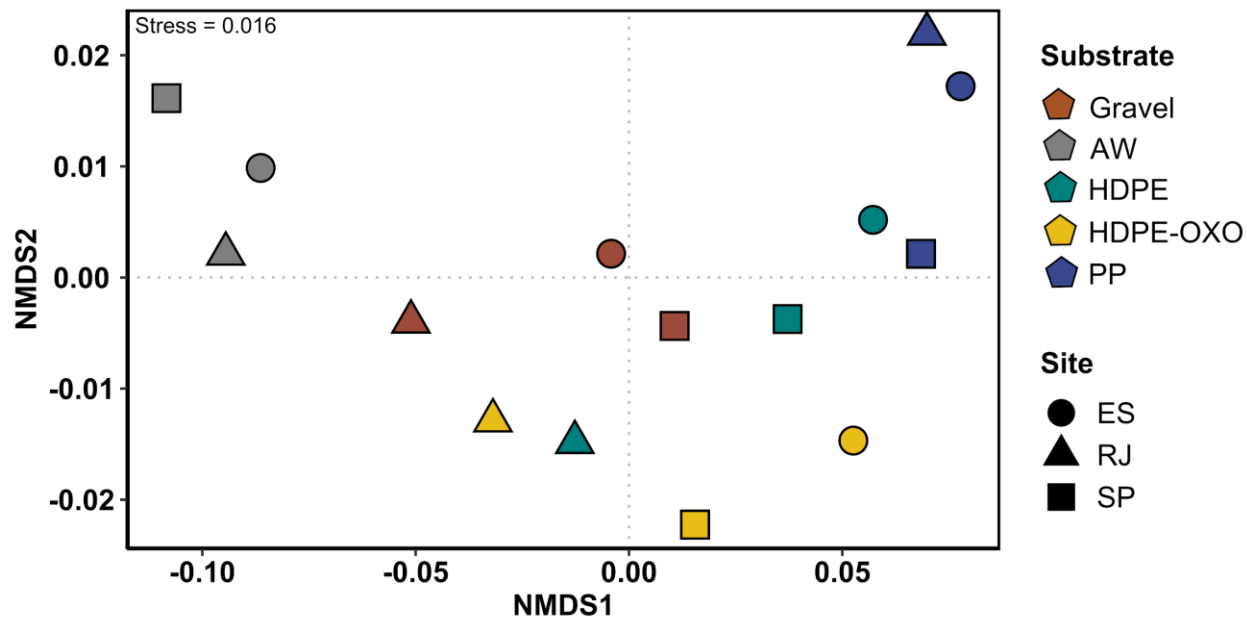

809

810 **Figure 2.** Non-metric multidimensional scaling (NMDS) ordination of weighted unifrac  
811 dissimilarities in microbial community structures. Substrate: Gravel; AW, adjacent water; HDPE,  
812 High density polyethylene bag (film); HDPE-OXO, High density polyethylene bag (film) with  
813 oxo-biodegradable additive BDA; PP, Polypropylene pellets. Sites: ES, Espírito Santo; RJ, Rio de  
814 Janeiro; SP, São Paulo.

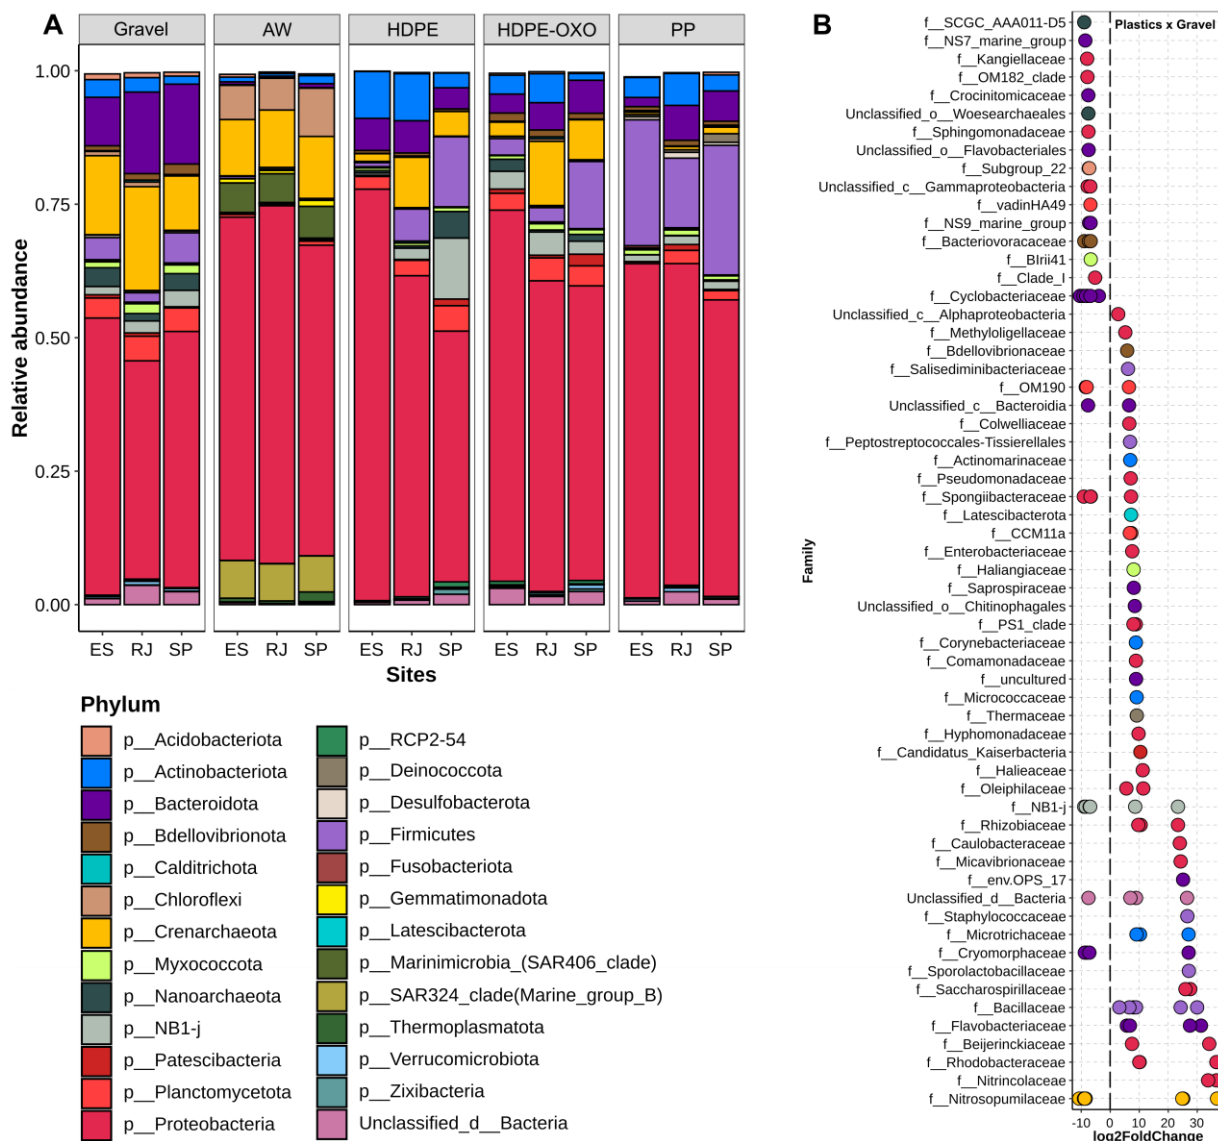

816 **Figure 3.** (A) Relative abundance of the microbial community at the Phylum level (Bacteria and  
 817 Archaea) among sites. (B) Differentially abundant Amplicon Sequence Variant (ASV) comparing  
 818 plastic substrates (HDPE, HDPE-OXO and PP merged) and gravel. Substrate: Gravel; AW,  
 819 adjacent water; HDPE, High density polyethylene; HDPE-OXO, High density polyethylene with  
 820 oxo-biodegradable additive BDA; PP, Polypropylene. Significant ASVs ( $p_{adj} < 0.05$ ) are  
 821 represented by single data points, grouped by family on the y-axis and by color according to the  
 822 taxonomic phylum from which the ASV originates. Positive values ( $\log_2\text{FoldChange}$ ) indicate  
 823 ASVs significantly more abundant in plastic substrates; Negative values indicate the opposite.  
 824 Unclassified taxa were represented by the prefix Unassigned\_.



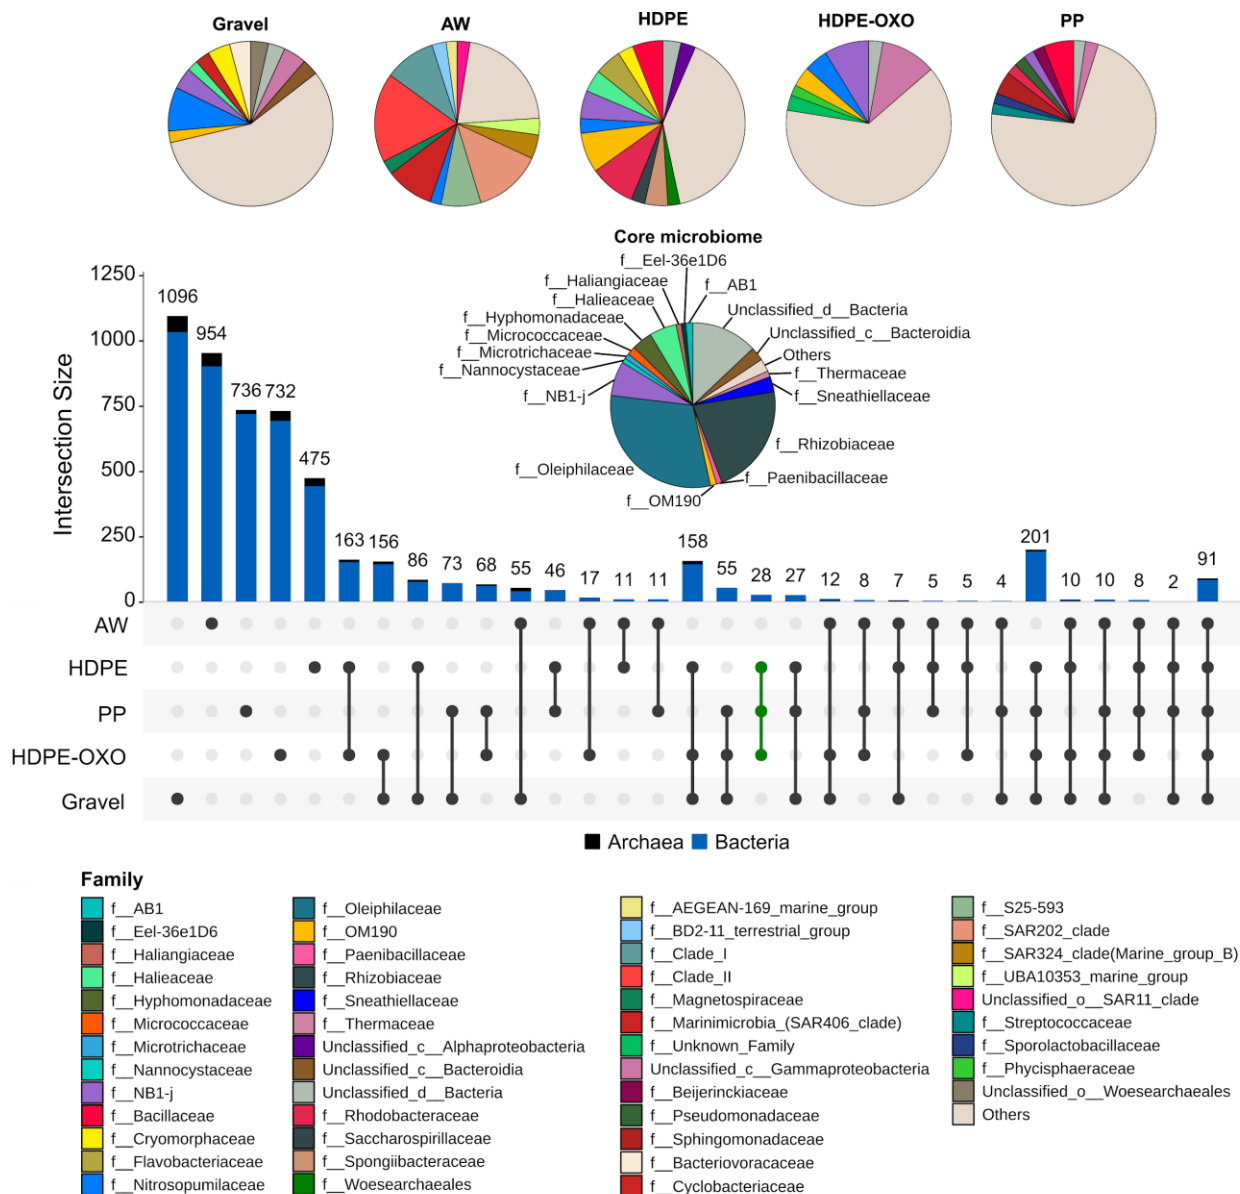

825  
 826 **Figure 4.** Upset plot composed by ASVs identified among substrates. Circles indicate substrates.  
 827 Black lines connecting circles indicate shared ASVs. Vertical bars indicate intersection size  
 828 (number of ASVs) on each set. Blue and black bars represent Bacteria and Archaea ASVs,  
 829 respectively. The green line represents ASVs shared by all plastic samples. Substrates: AW,  
 830 adjacent water; HDPE, High density polyethylene; HDPE-OXO, High density polyethylene with  
 831 biodegradable additive BDA; PP, Polypropylene. Pie charts show microbial composition specific  
 832 to each substrate (families with abundance > 2%) and those shared among plastics types (core  
 833 microbiome). Substrate: Gravel; AW, adjacent water; HDPE, High density polyethylene; HDPE-  
 834 OXO, High density polyethylene with oxo-biodegradable additive BDA; PP, Polypropylene.



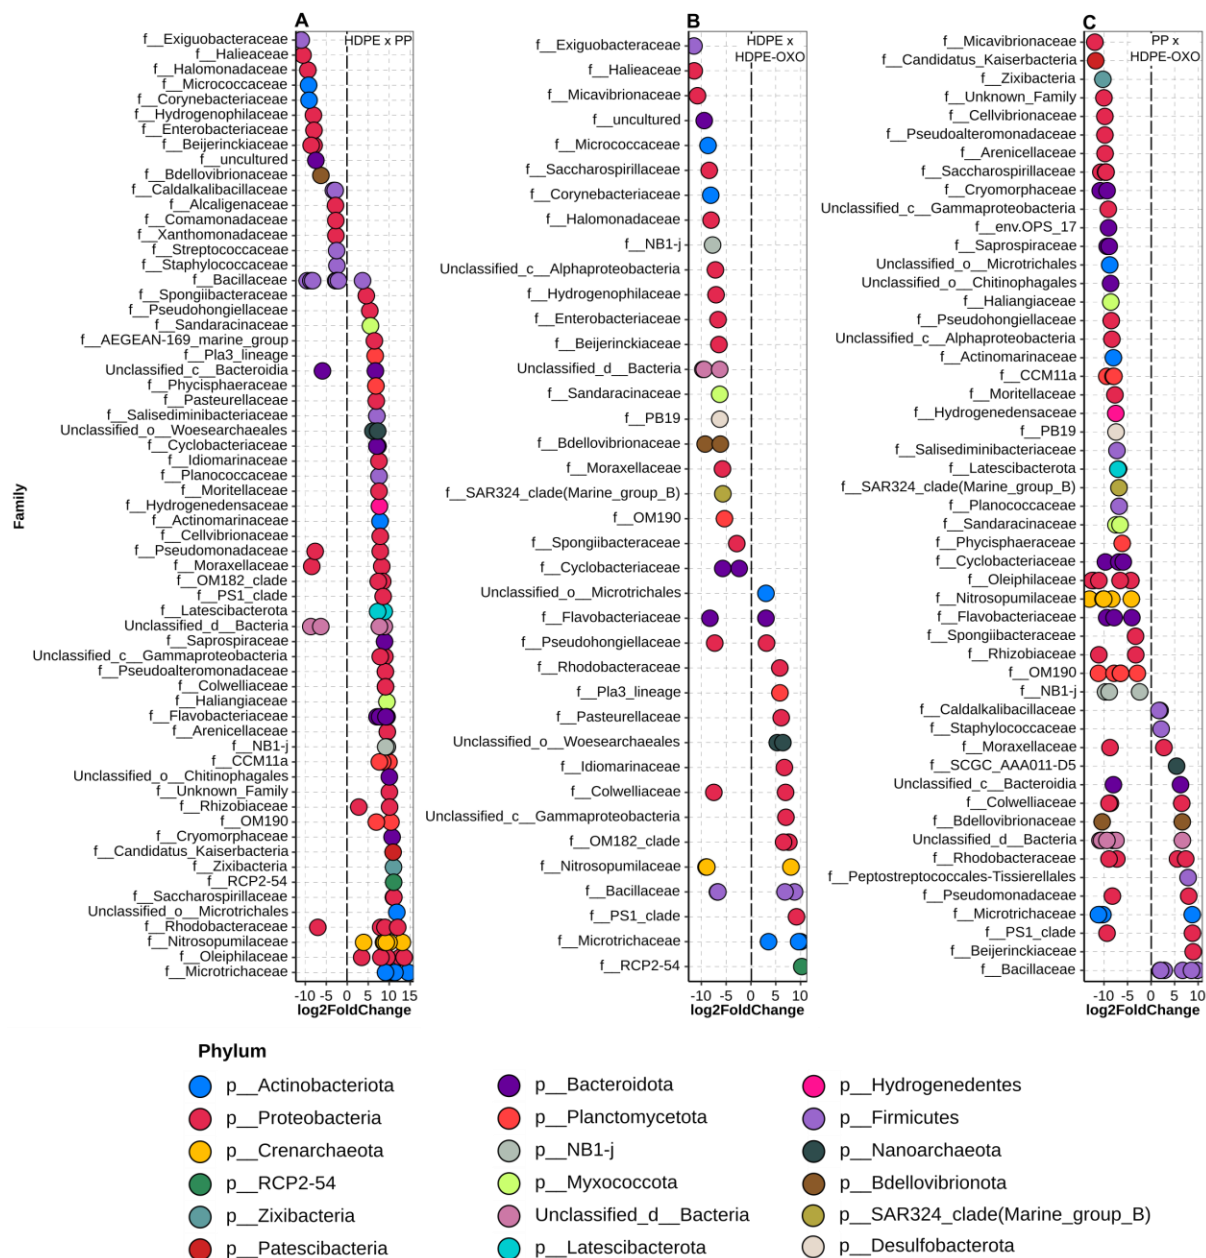

835  
 836 **Figure 5.** Differentially abundant Amplicon Sequence Variant (ASV) comparing HDPE and PP  
 837 (A), HDPE and HDPE-OXO (B); PP and HDPE-OXO (C). Significant ASVs ( $p_{adj} < 0.05$ ) are  
 838 represented by single data points, grouped by family on the y-axis and by color according to the  
 839 taxonomic phylum from which the ASV originates. Positive values ( $\log_2\text{FoldChange}$ ) indicate  
 840 ASVs that were significantly more abundant in HDPE (A and B) and PP (C) plastic substrates;  
 841 Negative values indicate the opposite. Substrate: Gravel; AW, adjacent water; HDPE, High density  
 842 polyethylene; HDPE-OXO, High density polyethylene with oxo-biodegradable additive BDA; PP,  
 843 Polypropylene.
